# Supplementary material
Source: publisher figshare collection journal article supplement (https://frontiersin.figshare.com/ndownloader/files/32983787)
Supplement: Supplementary file 1 [file 32983787]

**Microbes used:** 16S rRNA (for bacteria used) and 18S rRNA (for fungus used) were submitted in NCBI and accession number were received from NCBI. URL against each accession number is added in the below table.

| **Bacterial Strain** | **Accession Number** | **Bacteria** | **URL** |
| --- | --- | --- | --- |
| AK1 | MW444883 | *Lysinibacillus* sp. | [*https://www.ncbi.nlm.nih.gov/nuccore/MW444883.1?report=GenBank*](https://www.ncbi.nlm.nih.gov/nuccore/MW444883.1?report=GenBank) |
| AK2 | KY614289 | *Arthrobacter pascens* | [*https://www.ncbi.nlm.nih.gov/nuccore/KY614289.1?report=GenBank*](https://www.ncbi.nlm.nih.gov/nuccore/KY614289.1?report=GenBank) |
| AK3 | MW532754 | *Bacillus aryabhattai* | [*https://www.ncbi.nlm.nih.gov/nuccore/MW532754.1?report=GenBank*](https://www.ncbi.nlm.nih.gov/nuccore/MW532754.1?report=GenBank) |
| AK4 | KY614290 | *Kocuria rosea* | [*https://www.ncbi.nlm.nih.gov/nuccore/KY614290.1?report=GenBank*](https://www.ncbi.nlm.nih.gov/nuccore/KY614290.1?report=GenBank) |
| AK5 | KY614291 | *Arthrobacter sp.* | [*https://www.ncbi.nlm.nih.gov/nuccore/KY614291.1?report=GenBank*](https://www.ncbi.nlm.nih.gov/nuccore/KY614291.1?report=GenBank) |
| AK6 | KY614292 | *Kocuria flava* | [*https://www.ncbi.nlm.nih.gov/nuccore/KY614292.1?report=GenBank*](https://www.ncbi.nlm.nih.gov/nuccore/KY614292.1?report=GenBank) |
| AK7 | KY614293 | *Pseudomonas aeruginosa* | [*https://www.ncbi.nlm.nih.gov/nuccore/KY614293.1?report=GenBank*](https://www.ncbi.nlm.nih.gov/nuccore/KY614293.1?report=GenBank) |
| AK8 | MW444917 | *Bacillus megaterium* | [*https://www.ncbi.nlm.nih.gov/nuccore/MW444917.1?report=GenBank*](https://www.ncbi.nlm.nih.gov/nuccore/MW444917.1?report=GenBank) |
| AK9 | KY614294 | *Nocardioides* sp. | [*https://www.ncbi.nlm.nih.gov/nuccore/KY614294.1?report=GenBank*](https://www.ncbi.nlm.nih.gov/nuccore/KY614294.1?report=GenBank) |
| AK11 | MW444884 | *Bacillus* sp. | [*https://www.ncbi.nlm.nih.gov/nuccore/MW444884.1?report=GenBank*](https://www.ncbi.nlm.nih.gov/nuccore/MW444884.1?report=GenBank) |
| AK12 | MW444885 | *Pseudomonas* sp. | [*https://www.ncbi.nlm.nih.gov/nuccore/MW444885.1?report=GenBank*](https://www.ncbi.nlm.nih.gov/nuccore/MW444885.1?report=GenBank) |
| AK13 | KY614295 | *Sporosarcina luteola* | [*https://www.ncbi.nlm.nih.gov/nuccore/KY614295.1?report=GenBank*](https://www.ncbi.nlm.nih.gov/nuccore/KY614295.1?report=GenBank) |
| AK14 | KY614296 | *Bacillus niacini* | [*https://www.ncbi.nlm.nih.gov/nuccore/KY614296.1?report=GenBank*](https://www.ncbi.nlm.nih.gov/nuccore/KY614296.1?report=GenBank) |
| AK15 | MW444886 | *Bacillus siamensis* | [*https://www.ncbi.nlm.nih.gov/nuccore/MW444886.1?report=GenBank*](https://www.ncbi.nlm.nih.gov/nuccore/MW444886.1?report=GenBank) |
| A3 | MW444887 | *Pseudomonas* sp. | [*https://www.ncbi.nlm.nih.gov/nuccore/MW444887.1?report=GenBank*](https://www.ncbi.nlm.nih.gov/nuccore/MW444887.1?report=GenBank) |
| A9 | MW532755 | *Bacillus amyloliquefaciens* | [*https://www.ncbi.nlm.nih.gov/nuccore/MW532755.1?report=GenBank*](https://www.ncbi.nlm.nih.gov/nuccore/MW532755.1?report=GenBank) |
| A14 | MW444888 | *Staphylococcus* sp. | [*https://www.ncbi.nlm.nih.gov/nuccore/MW444888.1?report=GenBank*](https://www.ncbi.nlm.nih.gov/nuccore/MW444888.1?report=GenBank) |

| **Fungal Strain** | **Accession Number** | **Fungus** | ***Url*** |
| --- | --- | --- | --- |
| AK16 | KY614297 | *Trichoderma atroviride* | [*https://www.ncbi.nlm.nih.gov/nuccore/KY614297.1?report=GenBank*](https://www.ncbi.nlm.nih.gov/nuccore/MW532755.1?report=GenBank) |
| AK18 | KY614298 | *Aspergillus nidulans* | [*https://www.ncbi.nlm.nih.gov/nuccore/KY614298.1?report=GenBank*](https://www.ncbi.nlm.nih.gov/nuccore/KY614298.1?report=GenBank) |
| AK20 | KY614299 | *Aspergillus sydowii* | [*https://www.ncbi.nlm.nih.gov/nuccore/KY614299.1?report=GenBank*](https://www.ncbi.nlm.nih.gov/nuccore/KY614299.1?report=GenBank) |
